# Supplementary material for: Halogen-bond mediated efficient storage of extremely volatile perfluoroiodides in ionic liquids
Source: Royal Society of Chemistry journal article supplement (doi:10.1039/c9cc04198b), 2019-01-01
Supplement: c9cc04198b1.pdf [file c9cc04198b1.pdf]

## Supporting Information

### Halogen-bond mediated efficient storage of extremely volatile perfluoriodides in ionic liquids

Delphine Gaspard,<sup>a,c</sup> Kenneth. R. Seddon,<sup>a,d</sup> Peter K. J. Robertson<sup>b</sup> and H. Q. Nimal Gunaratne<sup>\*a,b</sup>

<sup>a</sup>The QUILL Research Centre, School of Chemistry and Chemical Engineering, the Queen's University of Belfast, Stranmillis Road, Belfast, Northern Ireland, BT9 5AG, UK.

<sup>b</sup>School of Chemistry and Chemical Engineering, the Queen's University of Belfast, Stranmillis Road, Belfast, Northern Ireland, BT9 5AG, UK.

<sup>c</sup>Ecole Supérieure de Chimie Organique et Minérale (Escom), Paris.

<sup>d</sup>Diseased

#### General materials and methods

Unless otherwise stated, all chemicals were purchased from either Sigma-Aldrich or TCI (UK) and used without further purifications.

<sup>1</sup>H NMR and <sup>13</sup>C NMR spectra were recorded on a Bruker Avance III 400 spectrometer (400 MHz). ESMS-mass spectroscopy measurements were carried out on a Waters LCT Premier instrument with an Advion TriVersa NanoMate injection system (cone voltage 50 V, source 120 °C). Both positive and negative ions were detected, with an m/z range of 50 to 1500. Samples were injected as dilute solutions in dry acetonitrile. FTIR spectra were obtained at room temperature on a PerkinElmer Spectrum 100 (ATR-IR).

**TGA:** The temperature of decomposition was measured on a TA instrument TGA Q5000 with a heating rate of 10 °C min<sup>-1</sup> under dinitrogen atmosphere. The onset of the weight loss in each thermogram was used as a measure of the decomposition temperature.

**DSC:** Thermal profiles of the ionic liquids were obtained using a TA DSC Q2000 model with a TA Refrigerated Cooling System 90 (RCS), equipped with an auto-sampler. A cooling and heating ramp of 2 °C min<sup>-1</sup> was used, ranging between -100 °C and 120 °C, depending on the ionic liquid system.

## Synthesis of ionic liquids

The ionic liquids, [bmim]Cl, [bmim]Br, [bmim]I, [bmim][NTf<sub>2</sub>] and [bmim][CH<sub>3</sub>OSO<sub>3</sub>] were synthesised using procedures reported in the literature.<sup>1</sup> Four ionic liquids, [bmim][OAc], [bmim][CF<sub>3</sub>CO<sub>2</sub>], [bmim][SCN] and [bmim][CF<sub>3</sub>SO<sub>3</sub>] were donated to us by Merck.

All ionic liquids were dried at 60 °C on a high vacuum line for 24 h and stored in a desiccator over CaCl<sub>2</sub>.

Notes: It is noteworthy that [bmim][NTf<sub>2</sub>] and CF<sub>3</sub>CF<sub>2</sub>CF<sub>2</sub>CF<sub>2</sub>I did not mix at the molar ratio that was used in this work. A clear phase separation was observed and hence, [bmim][NTf<sub>2</sub>] was eliminated from the study.

## Synthesis of ionic liquid (1)

Tris[2-(2-methoxyethoxy)ethyl]amine (3.23g, 10 mM) was taken up in CH<sub>3</sub>CN (5 cm<sup>3</sup>) in a screw cap tube to which iodomethane (1.7g, 12 mM) was added, then sealed with a screw cap and heated at 50 °C for 24 h. The reaction mixture was cooled, the solvent and the excess iodomethane were removed on a Rotavap to yield a light brown liquid which was further dried on high vacuum line at 60 °C to obtain (1) as a pale yellow liquid.

**(1):** <sup>1</sup>H NMR (400 MHz, in CDCl<sub>3</sub>): δ 4.05-3.95 (brm, 12H, 6xOCH<sub>2</sub>), 3.71-3.68 (m, 6H, 3xOCH<sub>2</sub>), 3.54- 3.52 (m, 6H, 3xN<sup>+</sup>CH<sub>2</sub>), 3.44 (s, 3H, N<sup>+</sup>CH<sub>3</sub>), 3.36 (s, 9H, 3xOCH<sub>3</sub>).

<sup>13</sup>C NMR (101 MHz, in CDCl<sub>3</sub>): δ 71.48, 70.31, 64.86, 63.33, 58.86, 50.93.

**ESMS:** For cation [C<sub>16</sub>H<sub>36</sub>NO<sub>6</sub>] requires 338.2543; observed 338.2519

For anion [I] requires 126.9045; observed 126.9041

**NMR spectra of new ionic liquids:**

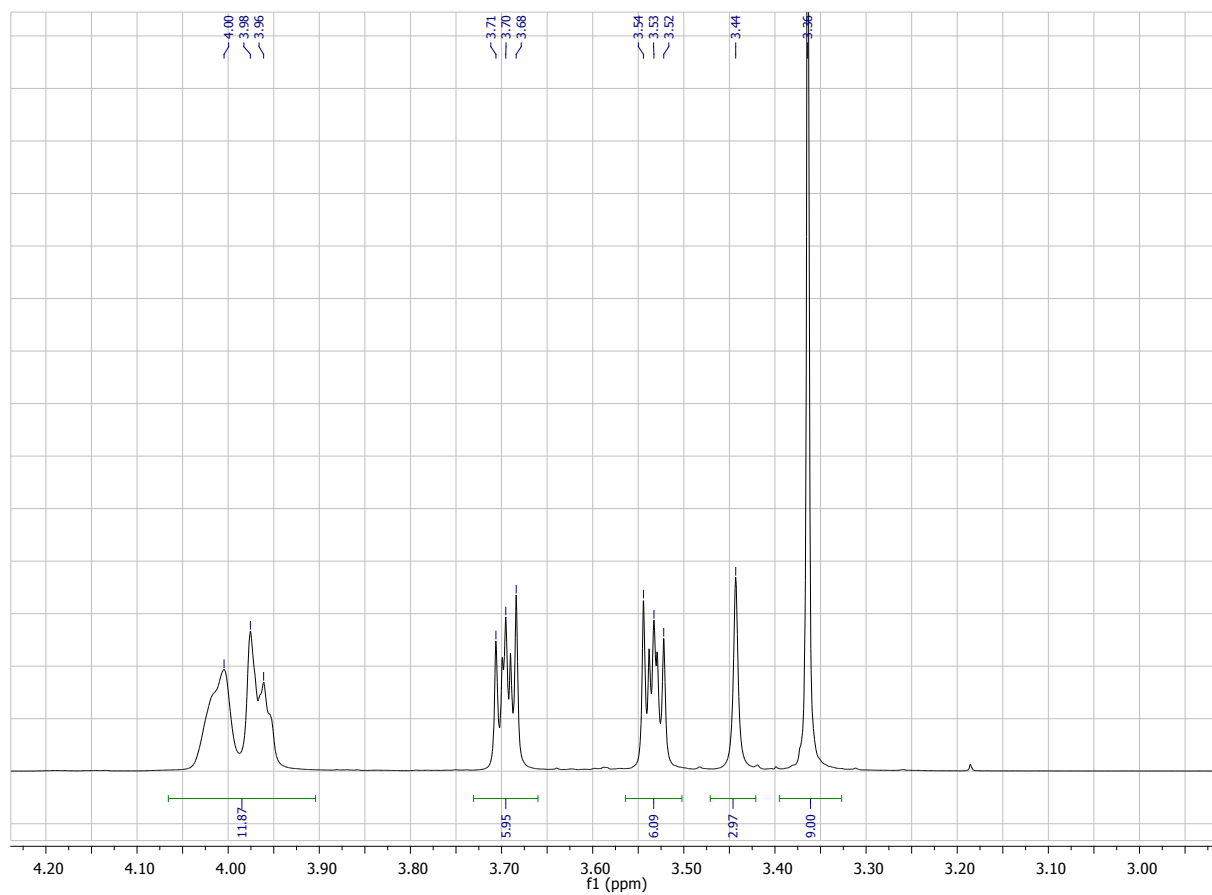

**Figure S1:** <sup>1</sup>H NMR (400 MHz) of ionic liquid (1) in CDCl<sub>3</sub>

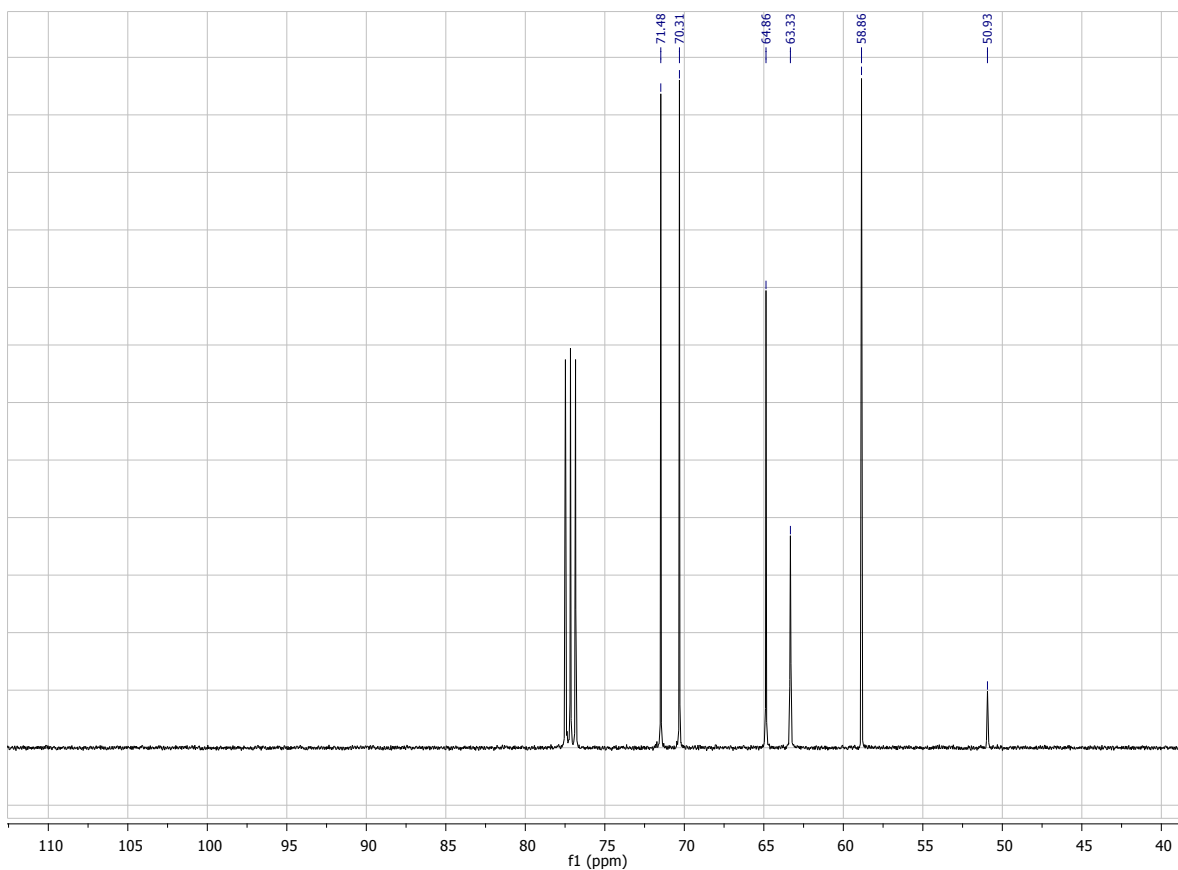

**Figure S2:**  $^{13}\text{C}$  NMR (101 MHz) of ionic liquid (**1**) in  $\text{CDCl}_3$

### DSCs and TGAs of new ionic liquids

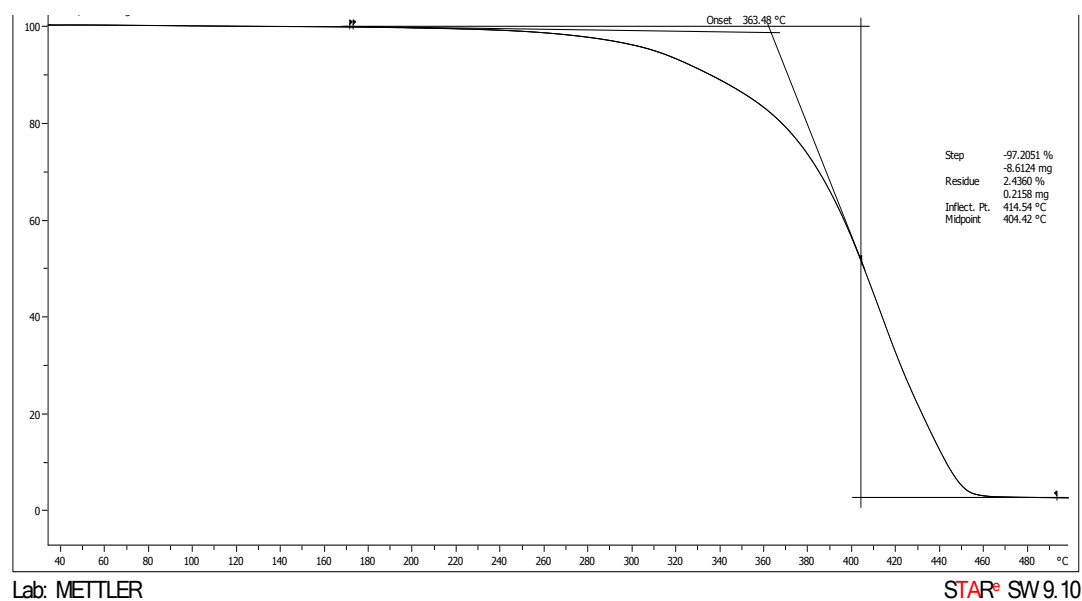

**Figure S3:** The Thermogravimetric analysis data of (**1**) (scan rate was set at  $10\text{ }^\circ\text{C m}^{-1}$ )

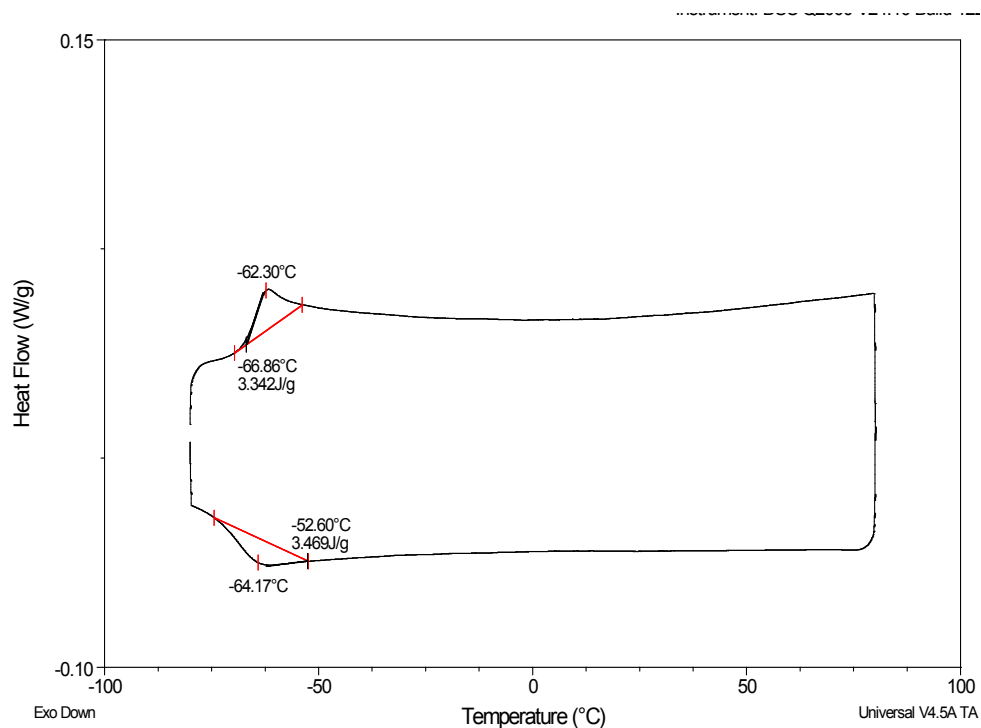

**Figure S4:** Differential scanning calorimetry of (1) (scan rate 5 °C m<sup>-1</sup>)

**Apparatus for conducting the experiments related to release of the perfluoroiodide from an ionic liquid matrix**

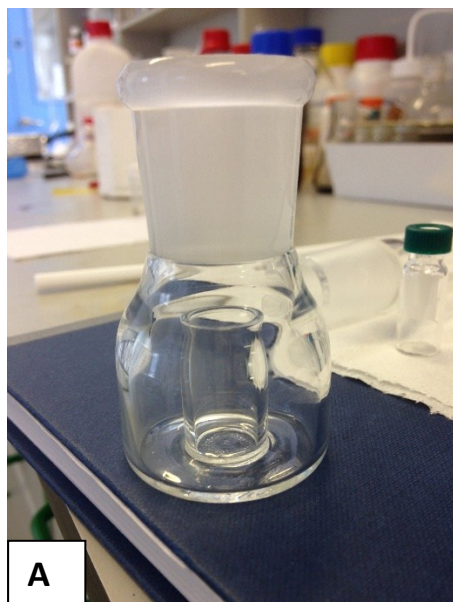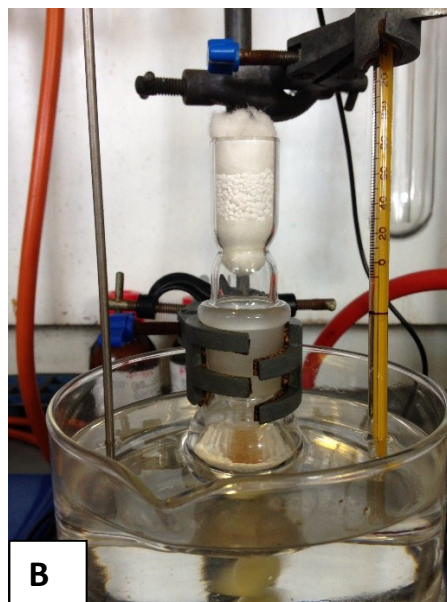

**Figure S5: A;** Glass jar with an inner compartment to house the GC-vial containing a mixture of ionic liquid and perfluoroiodide, **B;** final setup in a thermostatic oil bath with a drying tube attachment.

### Additional gravimetric experiments:

- (a)  $C_4F_9I$  (1 eq.) dissolved in ionic liquid (**1**; 1.2 eq.) can be heated to 50 °C in the apparatus shown in figure S5 and the released perfluoroiodide can be collected in a tube, cooled in dry ice, connected via the ground glass joint of the main apparatus. All the 'release' experiments were carried out in an efficient fumehood.
- (b) In a screw capped glass bottle, ionic liquid (**1**; 5 mM, 2.33g) was loaded with  $C_4F_9I$  (4 mM, 1.38g) was kept in a fumehood at room temperature. The total weight of the bottle containing ionic liquid and perfluoroiodide were measured at appropriate time intervals.

Total weight of bottle + IL+  $C_4F_9I$  = 29.71 g (t= 0 days)  
= 29.70 g (t= 7 days)  
= 29.67 g (t= 30 days)  
= 29.63 g (t= 90 days)

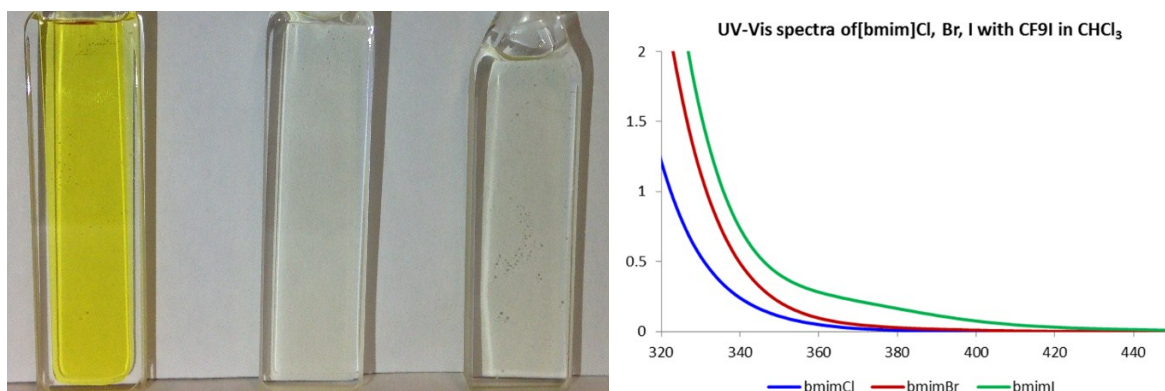

**Figure S6: A;** Glass jar with an inner compartment to house the GC-vial containing a mixture of ionic liquid and perfluoroiodide, **B;** final setup in a thermostatic oil bath with a drying tube attachment.

### References

1. *Ionic Liquids in Synthesis*, P. Wasserscheid and T. Welton, John Wiley & Sons, 25 Jun 2008; A. K. Burrell, R. E. Del Sesto, S. N. Baker, T. M. McCleskey and G. A. Baker, *Green Chem.*, 2007, **9**, 449–454
